# Supplementary material for: The eye, the kidney, and cardiovascular disease: old concepts, better tools, and new horizons
Source: PubMed Central journal article supplement — Kidney Int. 2020 Aug;98(2):323–42. doi: 10.1016/j.kint.2020.01.039 (PMC7397518; doi:10.1016/j.kint.2020.01.039), 2020-08
Supplement: mmc1.pdf [file mmc1.pdf]

**The eye, the kidney & cardiovascular disease:**

**old concepts, better tools & new horizons**

**Supplementary appendix**

Tariq E Farrah BSc MRCP<sup>1,2</sup>

Baljean Dhillon FRCS FRCPE FRCOphth<sup>3,4</sup>

Pearse A Keane MSc FRCOphth MRCSI<sup>5</sup>

David J Webb DSc FRCP<sup>1</sup>

Neeraj Dhaun PhD FRCP<sup>1,2</sup>

<sup>1</sup>University/BHF Centre for Cardiovascular Science, The Queen's Medical Research Institute, University of Edinburgh, Edinburgh, UK.

<sup>2</sup>Department of Renal Medicine, Royal Infirmary of Edinburgh, Edinburgh, UK

<sup>3</sup>Centre for Clinical Brain Sciences, University of Edinburgh, Edinburgh, UK

<sup>4</sup>Princess Alexandra Eye Pavilion, Edinburgh, UK

<sup>5</sup>NIHR Biomedical Research Centre for Ophthalmology, Moorfields Eye Hospital, London, UK

Correspondence to: Dr Neeraj Dhaun  
Centre for Cardiovascular Science  
The Queen's Medical Research Institute  
47 Little France Crescent, Edinburgh.  
E-mail: [bean.dhaun@ed.ac.uk](mailto:bean.dhaun@ed.ac.uk)

**Short title:** Retinal imaging & the kidney

## Contents

1. **Supplementary table 1.** *Retinal vascular metrics to predict incident hypertension*
2. **Supplementary table 2.** *Retinal vascular metrics to predict incident diabetes mellitus*
3. **Supplementary table 3.** *Retinal vascular metrics to predict cardiovascular disease*
4. **Supplementary figure legends**
5. **Supplementary figure 1.** *Alport syndrome-associated retinopathy*
6. **Supplementary figure 2.** *Retinal photography and fundus retinal calibre assessment*
7. **Supplementary figure 3.** *Retinal optical coherence tomography*
8. **Supplementary figure 4.** *Retinal layer segmentation by OCT*
9. **Supplementary figure 5.** *OCT angiography*
10. **Supplementary video legends**
11. **References**



## 1. Supplementary table 1. Retinal vascular metrics to predict incident hypertension

| Study                                                                              | Country     | n     | Population<br>Mean age                                                | Retinal<br>metric   | Clinical outcome                                                                               | Mean BP     | Diabetes | Follow up | Results                                                                                                                                                                                                                                 |
|------------------------------------------------------------------------------------|-------------|-------|-----------------------------------------------------------------------|---------------------|------------------------------------------------------------------------------------------------|-------------|----------|-----------|-----------------------------------------------------------------------------------------------------------------------------------------------------------------------------------------------------------------------------------------|
| Wong <sup>S1</sup><br>2004<br><br>Prospective,<br>Population -<br>based<br>cohort  | US          | 5,628 | Normotensive, white<br>and African-American<br>adults<br><br>59 years | AVR                 | Incident hypertension:<br>BP $\geq$ 140/90mmHg<br>or use of anti-<br>hypertensives             | 115/68 mmHg | 8%       | 3 years   | 14% developed hypertension<br><br>Smallest AVR quintile predicts incident<br>hypertension<br>Adjusted OR 1.6 (1.2-2.2) vs. widest quintile                                                                                              |
| Wong <sup>S2</sup><br>2004<br><br>Prospective,<br>Population -<br>based<br>cohort  | US          | 2,451 | Normotensive, white<br>adults<br><br>60 years                         | AVR<br>CRAE<br>CRVE | Incident hypertension:<br>BP $\geq$ 140/90mmHg<br>or use of anti-<br>hypertensives             | 125/75 mmHg | 6%       | 10 years  | 29% developed hypertension<br><br>Smallest AVR quartile predicted incident<br>hypertension:adjusted OR 1.8 (1.4-2.4) vs. widest<br><br>Similar association for CRAE<br>No association for CRVE                                          |
| Smith <sup>S3</sup><br>2004<br><br>Prospective,<br>Population -<br>based<br>cohort | Australia   | 1,319 | Adults with BP $\leq$ 159/<br>99 mmHg<br><br>64 years                 | AVR<br>CRAE<br>CRVE | Incident severe<br>hypertension:<br>BP $\geq$ 160/100 mmHg<br>or use of anti-<br>hypertensives | 136/80 mmHg | 6%       | 5 years   | 30% developed severe hypertension<br><br>Smallest AVR and narrowest CRAE quintile<br>predicted incident hypertension vs. widest<br><br>AVR: adjusted OR 2.0 (1.3-3)<br>CRAE: adjusted OR 2.1 (1.4-3.3)<br>No association for CRVE       |
| Ikram <sup>S4</sup><br>2006<br><br>Prospective,<br>Population -<br>based<br>cohort | Netherlands | 1,900 | Normotensive adults<br><br>64 years                                   | AVR<br>CRAE<br>CRVE | Incident hypertension:<br>BP $\geq$ 140/90mmHg<br>or use of anti-<br>hypertensives             | 122/69 mmHg | 4%       | 7 years   | 42% developed hypertension<br><br>Smallest quartile of AVR, narrowest CRAE and<br>CRVE associated with incident hypertension<br><br>AVR: Adjusted OR 1.7 (1.3-2.4)<br>CRAE: Adjusted OR 2.2 (1.6-2.9)<br>CRVE: Adjusted OR 1.4 (1.01-3) |
| Kawasaki <sup>S5</sup><br>2009<br><br>Prospective,                                 | US          | 2,583 | Multi-ethnic<br>normotensive adults<br><br>60 years                   | CRAE<br>CRVE        | Incident hypertension:<br>BP $\geq$ 140/90mmHg<br>or use of anti-<br>hypertensives             | 114/69 mmHg | 6%       | 3 years   | 17% developed hypertension<br><br>Narrower CRAE predicted incident hypertension:<br>adjusted OR 1.5 (1.01-2.14)<br>Persisted only in white subjects                                                                                     |

|                           |       |     |                                 |                         |                                                                                |             |           |         |                                                                                                                                                                                                                                              |
|---------------------------|-------|-----|---------------------------------|-------------------------|--------------------------------------------------------------------------------|-------------|-----------|---------|----------------------------------------------------------------------------------------------------------------------------------------------------------------------------------------------------------------------------------------------|
| Population - based cohort |       |     |                                 |                         |                                                                                |             |           |         | Wider CRVE associated with incident hypertension: adjusted OR 1.7 (1.13-2.53)                                                                                                                                                                |
| Tanabe <sup>S6</sup> 2010 | Japan | 310 | Normotensive adults<br>57 years | CRAE<br>CRVE<br>(n=310) | Incident hypertension:<br>BP $\geq$ 140/90mmHg<br>or use of anti-hypertensives | 117/71 mmHg | Undefined | 5 years | 32% developed hypertension<br><br>Narrowest CRAE tertile predicted incident hypertension: adjusted OR 2.4 (1.1-5)<br><br>Lost significance when further adjusted for BP: adjusted OR 2.1 (0.9-4.7) vs. widest<br><br>No association for CRVE |

BP – blood pressure, AVR – arteriole-to-venule ratio, OR – odds ratio, CRAE – central retinal arteriolar equivalents, CRVE – central retinal venular equivalents. All values are mean.

## 2. Supplementary table 2. Retinal vascular metrics to predict incident diabetes mellitus

| Study                                                                           | Country     | n     | Population Mean age                                                   | Retinal metric      | Clinical outcome                                                                                                                                 | Hypertension | Mean BP     | Follow up | Results                                                                                                                                                                                                                                                                                                                                                                                                                              |
|---------------------------------------------------------------------------------|-------------|-------|-----------------------------------------------------------------------|---------------------|--------------------------------------------------------------------------------------------------------------------------------------------------|--------------|-------------|-----------|--------------------------------------------------------------------------------------------------------------------------------------------------------------------------------------------------------------------------------------------------------------------------------------------------------------------------------------------------------------------------------------------------------------------------------------|
| Wong <sup>S7</sup><br>2002<br><br>Prospective,<br>Population -<br>based cohort  | US          | 7,993 | Non-diabetic White<br>and African-<br>American adults<br><br>59 years | AVR                 | Incident diabetes:<br>Fasting glucose $\geq 7$<br>mmol/L, random<br>glucose $\geq 11.1$ mmol/L<br>or use of anti-diabetic<br>medicines           | 34%          | 122/72 mmHg | 3.5 years | 4% developed diabetes<br><br>Smallest AVR quartile predicted incident diabetes: adjusted OR<br>1.7 (1.1-2.6) vs. largest quartile                                                                                                                                                                                                                                                                                                    |
| Wong <sup>S8</sup><br>2005<br><br>Prospective,<br>Population -<br>based cohort  | US          | 3,251 | Non-diabetic adults<br><br>60 years                                   | AVR<br>CRAE<br>CRVE | Incident diabetes:<br>random glucose $\geq 11.1$<br>mmol/L                                                                                       | 33%          | 127/78 mmHg | 10 years  | 8% developed diabetes<br><br>Smallest quintile AVR predicted incident diabetes: adjusted RR<br>1.5 (1.03-2.6) vs. largest quartile<br><br>Narrowest CRAE quintile associated with incident diabetes but<br>not when adjusting for other risk factors such as BP<br><br>RR greatest in those with smallest AVR and known<br>hypertension: adjusted RR 3.4 (1.7-4) vs. largest AVR and<br>normotensive<br><br>No association with CRVE |
| Ikram <sup>S9</sup><br>2006<br><br>Prospective,<br>Population -<br>based cohort | Netherlands | 2,309 | Non-diabetic adults<br><br>65 years                                   | AVR<br>CRAE<br>CRVE | Incident diabetes:<br>Fasting glucose<br>$\geq 7$ mmol/L<br><br>Incident impaired<br>fasting glucose (IFG):<br>Fasting glucose 6.1-<br>7.0mmol/L | No data      | 134/74 mmHg | 6.4 years | 13% developed IFG<br>5% developed diabetes<br><br>Smaller AVR and wider CRVE associated with IFG<br><br>Adjusted ORs for IFG<br>AVR: 1.15 (0.99-1.3) (per SD decrease)<br>CRVE: 1.14 (0.98-1.3) (per SD increase)<br><br>Adjusted ORs for diabetes:<br>AVR: 1.08 (0.86-1.4) (per SD decrease)<br>CRVE: 1.09 (0.87-1.4) (SD increase)<br><br>No association with CRAE                                                                 |
| Nguyen <sup>S10</sup><br>2008                                                   | Australia   | 803   | Non-diabetic adults;<br>adults with impaired<br>glucose tolerance     | CRAE<br>CRVE        | Incident diabetes:<br>Fasting glucose $\geq 7.0$<br>mmol/l, 2-hour plasma                                                                        | 45%          | 135/72 mmHg | 5 years   | 13% developed diabetes                                                                                                                                                                                                                                                                                                                                                                                                               |

| Prospective, Population - based cohort |           |       | and impaired fasting glucose |              | glucose $\geq$ 11.1 mmol/l or use of diabetic medications                                                                                    |     |             |          | Narrowest CRAE tertile predicted development of diabetes: adjusted OR 2.2(1.02-4.8) vs. widest tertile    |
|----------------------------------------|-----------|-------|------------------------------|--------------|----------------------------------------------------------------------------------------------------------------------------------------------|-----|-------------|----------|-----------------------------------------------------------------------------------------------------------|
|                                        |           |       | 57 years                     |              |                                                                                                                                              |     |             |          | No association for CRVE                                                                                   |
| Kifley <sup>S11</sup> 2008             | Australia | 2,123 | Non-diabetic adults          | CRAE<br>CRVE | Incident diabetes and IFG:<br>Incident diabetes:<br>Fasting glucose $\geq$ 7mmol/L<br>Incident impaired (IFG): Fasting glucose 6.1-7.0mmol/L | 68% | 144/83 mmHg | 10 years | 9% developed diabetes<br>6% developed IFG<br>13% developed diabetes or IFG                                |
| Prospective, Population - based cohort |           |       | 64 years                     |              |                                                                                                                                              |     |             |          | Wider CRVE predicted incident IFG only: adjusted OR 1.5 (1.1-2.1) for each SD increase in venular calibre |
|                                        |           |       |                              |              |                                                                                                                                              |     |             |          | No associations for CRAE                                                                                  |

BP – blood pressure, AVR – arteriole-to-venule ratio, OR – odds ratio, CRAE – central retinal arteriolar equivalents, CRVE – central retinal venular equivalents, RR – risk ratio, IFG – impaired fasting glucose. All values are mean.

### 3. Supplementary table 3. Retinal vascular metrics to predict cardiovascular disease outcomes

| Study                         | Country   | n    | Population Mean age                           | Retinal metric      | Clinical outcome                                                       | Hypertension | Mean BP                          | Diabetes | CKD     | Pre-existing CVD | Follow up | Results                                                                                                                                                                                                                                                                                                                                                                                                                                                                                                     |
|-------------------------------|-----------|------|-----------------------------------------------|---------------------|------------------------------------------------------------------------|--------------|----------------------------------|----------|---------|------------------|-----------|-------------------------------------------------------------------------------------------------------------------------------------------------------------------------------------------------------------------------------------------------------------------------------------------------------------------------------------------------------------------------------------------------------------------------------------------------------------------------------------------------------------|
| <b>Coronary heart disease</b> |           |      |                                               |                     |                                                                        |              |                                  |          |         |                  |           |                                                                                                                                                                                                                                                                                                                                                                                                                                                                                                             |
| Wong <sup>S12</sup> 2002      | US        | 9648 | White and African-American adults<br>60 years | AVR                 | Incident CHD: fatal/non-fatal myocardial infarction, revascularisation | 40%          | 89 mmHg (mean arterial pressure) | 17%      | No data | No data          | 3.5 years | 3% developed CHD<br><br>Smallest 2 AVR quintiles associated with an increased risk of incident CHD in <b>women only</b> : lowest AVR quintiles adjusted RRs: Q1 2.2 (1-4.6) and Q2 2.3(1-4.8) vs. largest.<br><br>Relationship strongest in women without hypertension or diabetes and for myocardial events rather than revascularisation.                                                                                                                                                                 |
| Wang <sup>S13</sup> 2006      | Australia | 3340 | White adults<br>65 years                      | AVR<br>CRAE<br>CRVE | CHD mortality: defined by national health database ICD coding          | 45%          | 146/84 mmHg                      | 7%       | No data | 13%              | 9 years   | 6% died from CHD<br><br>For women < 75 years old, smallest AVR quartiles associated with nearly 3-fold increased risk of CHD mortality vs. largest quartile<br><br>Narrower CRAE and wider CRVE associated with greater risk of CHD mortality per SD change:<br><br>Women <75 years<br>CRAE adjusted HR 1.5 (1.1-2.2)<br>CRVE adjusted HR 1.5 (1.1-2.2)<br>Men <75 years<br>CRAE adjusted HR 1.1 (0.8-1.4)<br>CRVE adjusted HR 1.4 (1.1-1.8)<br><br>No associations in >75 years olds regardless of gender. |
| Liew <sup>S14</sup> 2011      | Australia | 3303 | White adults<br>65 years                      | <i>Df</i>           | CHD mortality: defined by national health database ICD coding          | 70%          | 146/84 mmHg                      | 7%       | No data | 16%              | 14 years  | 14% died from CHD<br><br>Highest and lowest quartiles of <i>Df</i> associated with increased risk of CHD mortality:                                                                                                                                                                                                                                                                                                                                                                                         |

Lowest *Df* adjusted HR 1.5 (1.2-1.9)  
 Highest *Df* adjusted HR 1.6 (1.2-2.1)

In those <70 years suboptimal *Df* associated with nearly 2-fold greater risk of CHD mortality

**Stroke**

|                                 |             |       |                                                   |                     |                                                                                                                           |         |             |     |         |                       |           |                                                                                                                                                                                                                                                                                                                                                                                                 |
|---------------------------------|-------------|-------|---------------------------------------------------|---------------------|---------------------------------------------------------------------------------------------------------------------------|---------|-------------|-----|---------|-----------------------|-----------|-------------------------------------------------------------------------------------------------------------------------------------------------------------------------------------------------------------------------------------------------------------------------------------------------------------------------------------------------------------------------------------------------|
| Wong <sup>S15</sup><br>2001     | US          | 10358 | White and African-American adults<br><br>54 years | AVR                 | Incident stroke: defined by subject recall, health records and ICD coding of hospital admissions and discharges           | 33%     | 120/77 mmHg | 10% | No data | 4% (coronary disease) | 3.5 years | 1% had an ischaemic stroke<br><br>Smallest AVR quintile associated with greatest risk of any incident stroke and ischaemic stroke: unadjusted RR 2.35 and 2.3; age, gender and race adjusted RR 1.98 and 1.91, vs. widest respectively.<br><br>No association when adjusted for BP, diabetes, hypertension, smoking and lipids                                                                  |
| Mitchell <sup>S16</sup><br>2005 | Australia   | 3583  | White adults<br><br>68 years                      | AVR                 | Incident stroke and stroke death defined by subject recall, health records and ICD hospital admission and discharge codes | 49%     | 147/84 mmHg | 6%  | No data | No data               | 5 years   | 3% of patients had a stroke or died from a stroke<br><br>AVR not associated with incident stroke events in adjusted analyses.                                                                                                                                                                                                                                                                   |
| Ikram <sup>S17</sup><br>2006    | Netherlands | 5540  | White adults with no prior stroke<br><br>67 years | AVR<br>CRAE<br>CRVE | Incident stroke: from health records and neuroimaging;<br><br>Subdivided into infarction or haemorrhage                   | No data | 138/73 mmHg | 9%  | No data | No data               | 8.5 years | 7% had a stroke, nearly 2/3 of these were infarcts.<br><br>Wider CRVE and smaller AVR as quartiles and continuous variables were associated with increased risk of stroke, particularly infarction<br><br>CRVE age, sex adjusted HR: 1.3 (1.03-1.6)<br>AVR age, sex adjusted HR: 1.5 (1.2-1.9)<br>CRVE association remained when adjusted for CVD risk factors<br><br>No associations with CRAE |

|                                   |             |       |                                                   |                                                             |                                                                                                                                                               |     |                        |     |          |         |           |                                                                                                                                                                                                                                                                                                                                                                                                                                                                                            |
|-----------------------------------|-------------|-------|---------------------------------------------------|-------------------------------------------------------------|---------------------------------------------------------------------------------------------------------------------------------------------------------------|-----|------------------------|-----|----------|---------|-----------|--------------------------------------------------------------------------------------------------------------------------------------------------------------------------------------------------------------------------------------------------------------------------------------------------------------------------------------------------------------------------------------------------------------------------------------------------------------------------------------------|
| Yatsuya <sup>S18</sup><br>2010    | US          | 10496 | White and African-American adults<br><br>59 years | CRAE<br>CRVE                                                | Incident ischaemic stroke: defined from health records, ICD admission and neuroimaging;<br><br>Strokes subclassified into lacunar, non-lacunar, cardioembolic | 29% | 121 mmHg (systolic BP) | 14% | No data  | No data | 11 years  | 3% suffered an ischaemic stroke, of which 20% were lacunar.<br><br>Narrower CRAE associated with increased risk lacunar stroke both as narrowest quintile vs. widest (adjusted HR 5.2(1.9-14.1)) and as continuous variable per SD decrease (HR 1.7(1.2-2.3))<br><br>Wider CRVE associated with increased risk of lacunar stroke as continuous variable, adjusted HR 1.4 (1.1-1.9)<br><br>No association with non-lacunar or cardioembolic events                                          |
| Wieberdink <sup>S19</sup><br>2010 | Netherlands | 5518  | White adults with no prior stroke<br><br>67 years | CRAE<br>CRVE                                                | Incident stroke: from health records and neuroimaging;<br><br>Subdivided into infarction or haemorrhage                                                       | 55% | 138/73 mmHg            | 10% | No data  | 3%      | 11.5      | 11% had a first stroke, 58% infarction, 10% haemorrhage, remainder undefined<br><br>Wider CRVE as a continuous variable or quartiles was associated with increased risk of any stroke, infarcts and haemorrhagic strokes: Stroke adjusted HR 1.2 (1.1-1.3) Infarction adjusted HR 1.3 (1.1-1.5) Haemorrhage adjusted HR 1.5 (1-2) (all per SD increase)<br><br>Narrower CRAE had borderline associations with stroke risk, except for anticoagulation-associated intracerebral haemorrhage |
| Cheung <sup>S20</sup><br>2013     | Singapore   | 2644  | Malay adults without prior stroke<br><br>57 years | CRAE<br>CRVE<br>Tortuosity<br><i>Df</i><br>Branching angles | Incident stroke: from health records                                                                                                                          | 66% | 145/80 mmHg            | 22% | 91umol/L | No data | 4.4 years | 2% had a stroke, 85% ischaemic<br><br>Wider CRVE was associated with increased risk of stroke, both as widest quartile vs. narrowest (adjusted HR 3.3, 1.3-8.6) and as continuous increasing variable (1.3, 1-1.6)<br><br>No other vascular metrics associated with risk of stroke.                                                                                                                                                                                                        |

Addition of retinal metrics to clinical tools improved stroke risk stratification by ~9%

**Coronary heart disease and stroke**

|                             |                  |                |                                                                    |              |                                                                                                                                |                                                |                            |           |         |            |          |                                                                                                                                                                                                                                                                                                                                                                                                                                               |
|-----------------------------|------------------|----------------|--------------------------------------------------------------------|--------------|--------------------------------------------------------------------------------------------------------------------------------|------------------------------------------------|----------------------------|-----------|---------|------------|----------|-----------------------------------------------------------------------------------------------------------------------------------------------------------------------------------------------------------------------------------------------------------------------------------------------------------------------------------------------------------------------------------------------------------------------------------------------|
| Wong <sup>S21</sup><br>2003 | US               | 413 CVD deaths | White adults<br>Age not reported                                   | AVR          | Cardiovascular mortality: ICD coding of fatal myocardial infarction or stroke                                                  | 70% in those with CVD death<br>60% in controls | 140/74 mmHg<br>136/75 mmHg | 24%<br>9% | No data | 43%<br>22% | 10 years | Lowest AVR quintile associated with increased risk of CVD mortality: Adjusted RR 1.5 (1.1-2.1) mainly in younger subjects (43-74 years)                                                                                                                                                                                                                                                                                                       |
| Wong <sup>S22</sup><br>2006 | US               | 1992           | Predominantly white adults >65 years with no prior CVD<br>78 years | CRAE<br>CRVE | Incident CVD:<br>Incident CHD: fatal/non-fatal myocardial infarction, other CHD death; Incident stroke: fatal/non-fatal stroke | 58%                                            | 130/67 mmHg                | 15%       | No data | 0%         | 5 years  | CHD events 6%<br>Stroke events 6%<br><br>Narrowest CRAE and widest CRVE quartile associated with increased risk of CHD events vs. widest/narrowest respectively: CRAE adjusted HR: 2 (1.1-3.8) CRVE adjusted HR: 3 (1.6-5.8)<br><br>Stronger associations for CRVE in those >80, diabetics and hypertensive<br><br>Widest CRVE quartile only associated with increased risk of stroke: adjusted HR 2.2 (1-4.3)                                |
| Wang<br>2006 <sup>S23</sup> | US and Australia | 7494           | Predominantly white adults >90%<br>63 years                        | CRAE<br>CRVE | Incident CVD mortality: death from stroke or CHD                                                                               | 58%                                            | No data                    | 8%        | No data | 22%        | 11 years | CHD deaths 9%<br>Stroke deaths 4%<br><br>Narrowest CRAE and widest CRVE quintile associated with increased risk of death from coronary heart disease vs. other quintiles: CRAE adjusted HR: 1.3 (1.1-1.6) CRVE adjusted HR: 1.2 (1.0-1.5)<br><br>Associations strongest in the US cohort and those <70 years<br><br>No associations between CRVE or any continuous retinal vascular metric and incident stroke mortality in adjusted analyses |



|                                               |           |       |                                                                                      |                     |                                                                                                           |     |                        |     |           |    |           |                                                                                                                                                                                                                                                                                                                                                                                                                                                                          |
|-----------------------------------------------|-----------|-------|--------------------------------------------------------------------------------------|---------------------|-----------------------------------------------------------------------------------------------------------|-----|------------------------|-----|-----------|----|-----------|--------------------------------------------------------------------------------------------------------------------------------------------------------------------------------------------------------------------------------------------------------------------------------------------------------------------------------------------------------------------------------------------------------------------------------------------------------------------------|
| Siedelmann <sup>S2</sup> <sub>4</sub><br>2016 | US        | 10470 | White and African-American adults without prior CVD or heart failure<br><br>59 years | CRAE<br>CRVE<br>AVR | Incident CVD events and death: myocardial infarction, revascularisation, stroke, heart failure            | 30% | 125 mmHg (systolic BP) | 14% | No data   | 0% | 16 years  | 1778 coronary events<br>548 stroke events<br>1395 heart failure events<br>26% mortality<br><br>Narrower CRAE associated with increased risk of death (adjusted HR 1.14) and stroke (adjusted HR 1.06) in all subjects; Wider CRVE showed stronger associations for both stroke and death.<br><br>Narrower CRAE/wider CRVE associated with increased CHD in women only<br><br>Addition of retinal metrics to clinical tools improved CVD event risk stratification by 11% |
| Yip <sup>S25</sup><br>2017                    | Singapore | 3496  | Malay adults without prior CVD<br><br>58 years                                       | CRAE<br>CRVE        | Incident CVD events defined as: myocardial infarction, stroke and cardiovascular death certificate coding | 58% | 140/82                 | 38% | 77mls/min | 0  | 5.8 years | 4% developed overt CVD<br><br>Wider CRVE as a continuous variable or quartiles was associated with increased risk of CVD events: Adjusted HR 2.1(1.2-3.7) vs narrowest quartile.<br><br>No relationship between CRAE and CVD events.<br><br>Association of venular widening with microalbuminuria was associated with greater risk of incident CVD than either measure alone                                                                                             |

BP – blood pressure, AVR – arteriole-to-venule ratio, OR – odds ratio, CRAE – central retinal arteriolar equivalent, CRVE – central retinal venular equivalent, RR – risk ratio, IFG – impaired fasting glucose, HR – hazard ratio, eGFR – estimated glomerular filtration rate, CKD – chronic kidney disease. *Df* - fractal dimension, CVD – cardiovascular disease, CHD – coronary heart disease, ICD – International Classification of Diseases. All values are mean.

#### **4. Supplementary figure legends**

##### **Supplementary figure 1.** *Alport syndrome-associated retinopathy.*

Ultra-wide field scanning laser ophthalmoscope photograph of left eye from a male patient with end-stage renal disease secondary to X-linked Alport syndrome. The characteristic dot-and-fleck retinopathy is evident as green peri-macular deposits in the centre of the image. There is also associated loss of foveal reflex due to macular thinning. The presence of Alport-associated retinopathy can help diagnosis, suggest inheritance patterns, identify those at risk of progressive CKD and differentiate from mimics such as thin GBM disease which has no associated retinal features.<sup>S26, 27</sup>

##### **Supplementary figure 2.** *Retinal photography and fundus retinal calibre assessment*

**A.** Right eye digital retinal photograph using Canon CR-1 fundus camera with a field of view of 45°.

**B.** Right eye scanning laser ophthalmoscope image centred over optic disc using the Heidelberg SPECTRALIS® Spectral-Domain OCT machine (SD-OCT, Heidelberg Engineering, Heidelberg, Germany). The centre of the optic disc is manually determined. A standard set of concentric circular measurement zones commonly used in the analysis of fundus camera images is mapped from this point as shown. Zone ‘A’ is the area 0.5 to 1 optic disc diameters away from the centre as bounded by the white dotted lines. The vessel analysis software VAMPIRE® (University of Dundee, United Kingdom) selects the six widest arterioles (red) and venules (blue) crossing zone A to calculate CRAE, CRVE and AVR.

##### **Supplementary figure 3.** *Retinal optical coherence tomography.*

*Blue lines* represent fibre paths. *Red lines* represent optical paths. *Green lines* represent signal paths. Low coherence light (typically ~800 nm wavelength) is split into a sample beam and

reference beam. The sample beam is shone onto the retina and reflected back as ‘light echoes’. The reference beam is directed to a mirror positioned at a known distance from the light source. A range of ‘sample’ light echoes each return at different times depending on the distance of the reflecting tissue from the light source. Returning ‘sample’ and ‘reference’ light echoes are re-united and directed to a photodetector. An interference signal is detected when the time delays between the ‘sample’ and ‘reference’ light echoes is small, *i.e.* the distance of reference mirror matches the distance of the reflecting tissue. Moving the reference mirror (positions A to C) alters the distance the reference beam/echo must travel and thus changes the time delay between reference and sample echoes. At each new reference mirror distance, the reference echo time delay will closely match a different sample echo time delay, generating a new interference signal corresponding to a deeper/shallower reflecting tissue layer. Sequential movement of reference mirror allows the construction of a single interference depth profile: the A-scan. A-scans obtain depth profiles along the z-axis. The lateral scanning mirror is rotated through positions 1 to 4 along the x-axis to obtain sequential adjacent A-scans which are used to generate a single horizontal B-scan. The vertical scanning mirror is elevated/lowered along the y-axis to obtain horizontal B-scans at multiple levels. B-scans can then be stacked to create a volume scan (**Supplementary videos 1 and 2**).

**Supplementary figure 4.** *Retinal layer segmentation by OCT.* Close up of horizontal line OCT scan through the macula of the right eye using the Heidelberg SPECTRALIS® SD-OCT (Heidelberg Engineering, Heidelberg, Germany) with automated segmentation of individual retinal layers. RNFL – retinal nerve fibre layer, GCL – ganglion cell layer, IPL – inner plexiform layer, INL – inner nuclear layer, OPL – outer plexiform layer, ONL – outer nuclear layer, PR – photoreceptor layer, RPE – retinal pigment epithelium, BM – Bruch’s membrane, CH – choroid.

**Supplementary figure 5. OCT angiography**

Right eye 3 x 3mm OCT angiograms *en face* (left panels) and in cross-section (right panels), centred on the macula, using the AngioVue® Imaging System (Optovue, Inc., Fremont, California).

**A. Left panel:** The peri-macular superficial capillary plexus and the foveal avascular zone.

*Right panel:* OCT image showing the level and boundaries of retinal layer segmentation the corresponds to *en face* angiogram. Red and green lines define the upper and lower limits respectively, of the segmentation band.

**B. Left panel:** The peri-macular deep capillary plexus and the foveal avascular zone. *Right*

*panel:* OCT image showing the level and boundaries of deeper retinal layer segmentation the corresponds to *en face* angiogram. Red and green lines define the upper and lower limits respectively, of the segmentation band.

**C. Left panel:** The outer (deepest) retinal layers are relatively avascular as shown and is thus

dependent on passive oxygenation from the deeper choroidal circulation. *Right panel:* OCT image showing the level and boundaries of outer retinal layer segmentation the corresponds to *en face* angiogram. Red lines define the upper and lower limits of the segmentation band.

**D. Left panel:** The subfoveal choriocapillaris is a dense mesh of capillaries underneath the

pigment epithelium. Despite advances in OCT-A, imaging discrete vessels here remains challenging. *Right panel:* OCT image showing the level and boundaries of choriocapillaris segmentation the corresponds to *en face* angiogram. Red and green lines define the upper and lower limits respectively, of the segmentation band.

Supplementary figure 1 Alport syndrome-associated retinopathy

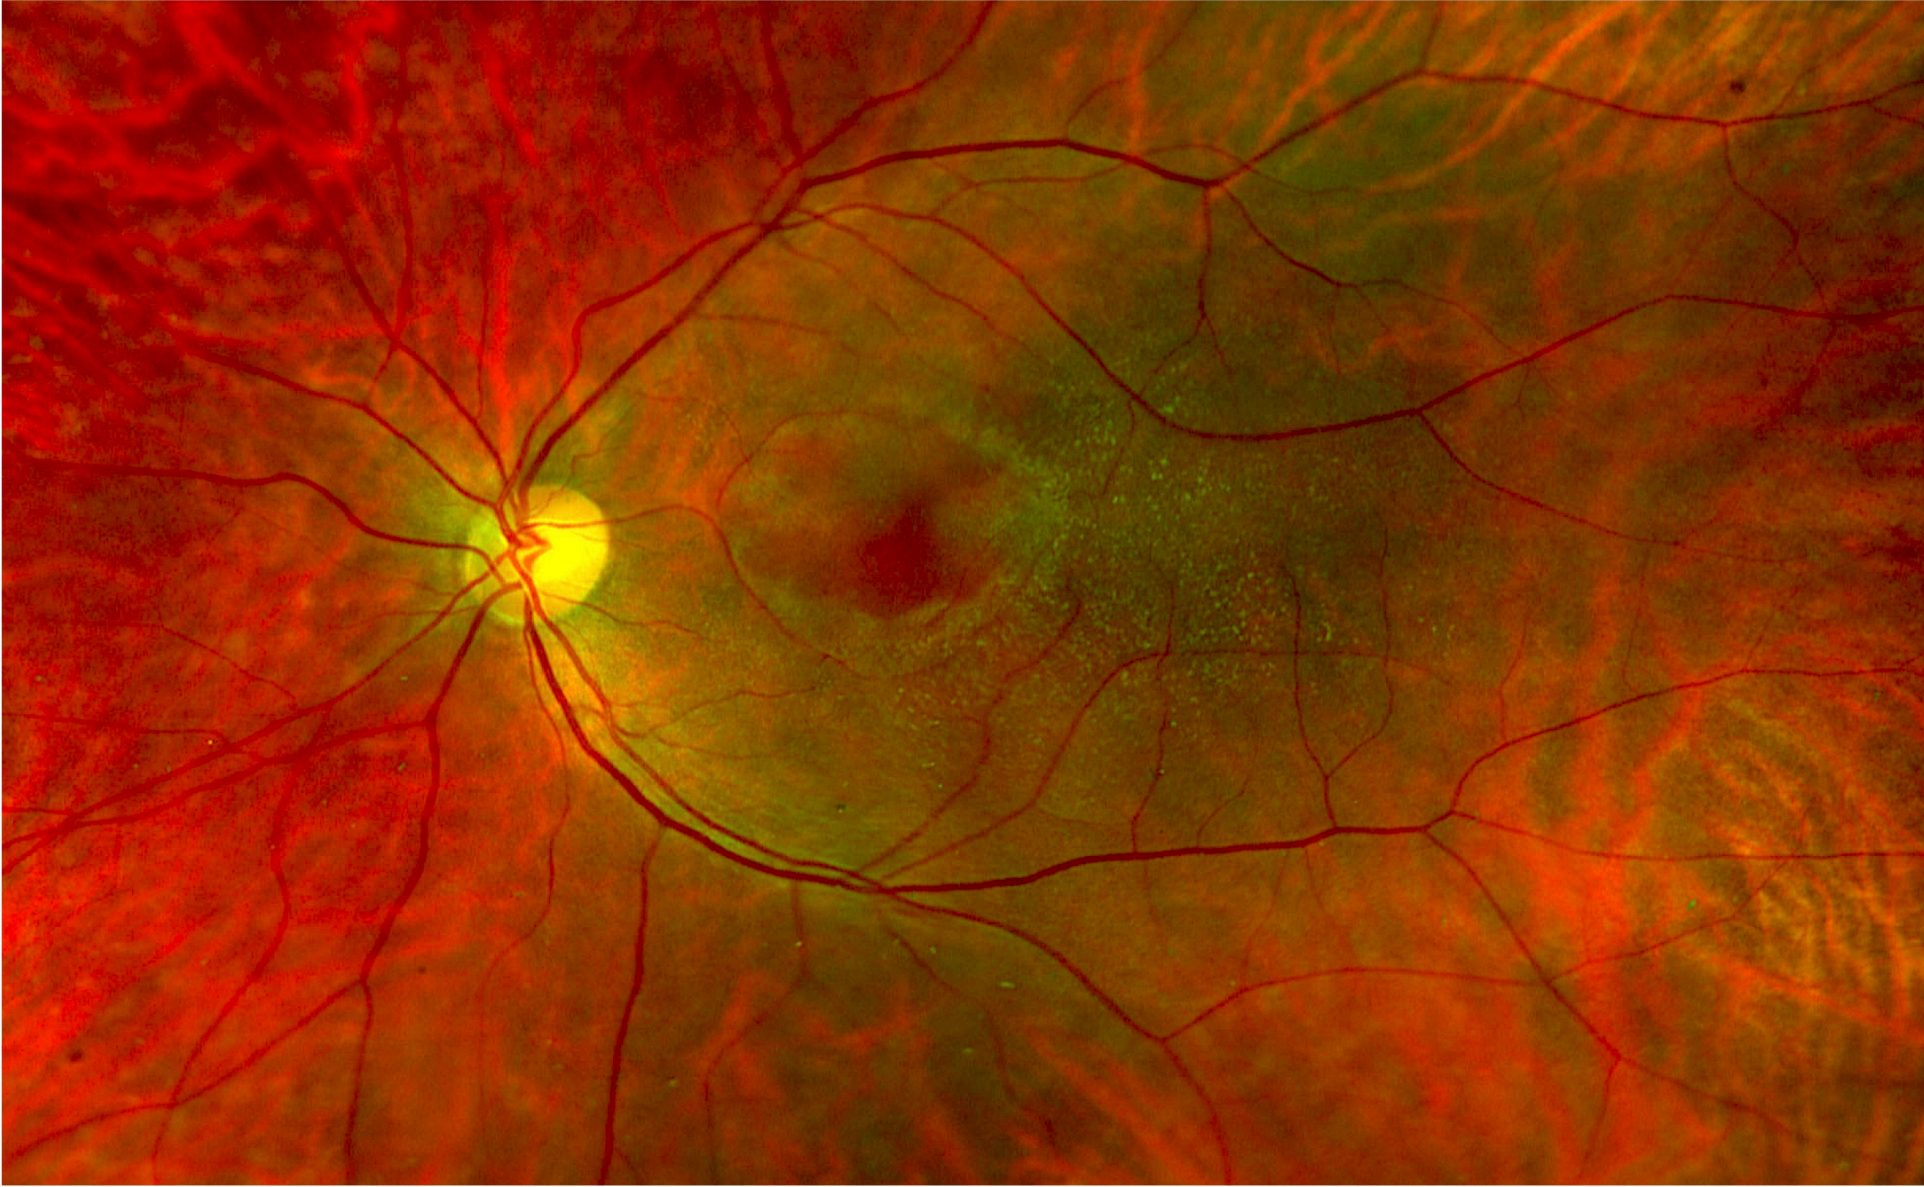



Supplementary figure 2 Retinal photography and fundus retinal calibre assessment

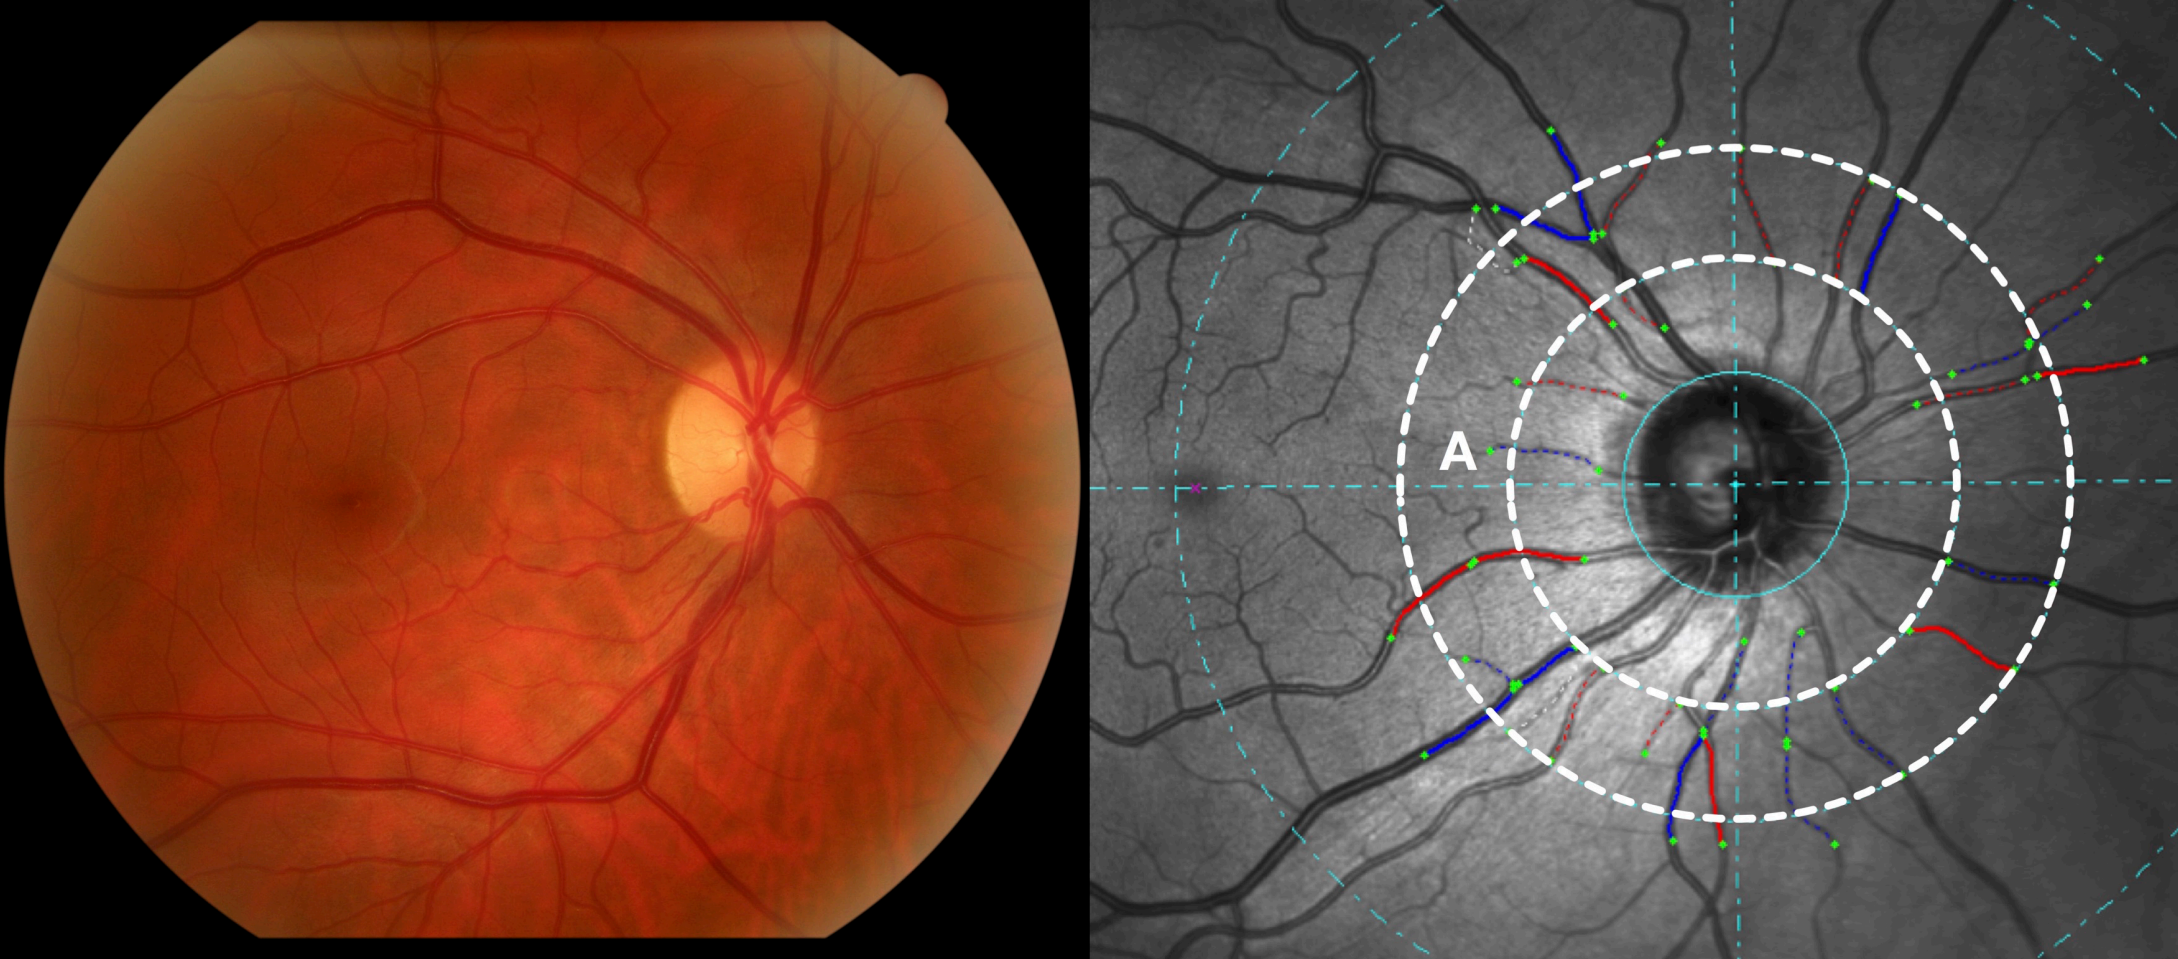

Supplementary figure 3  
Retinal optical coherence tomography

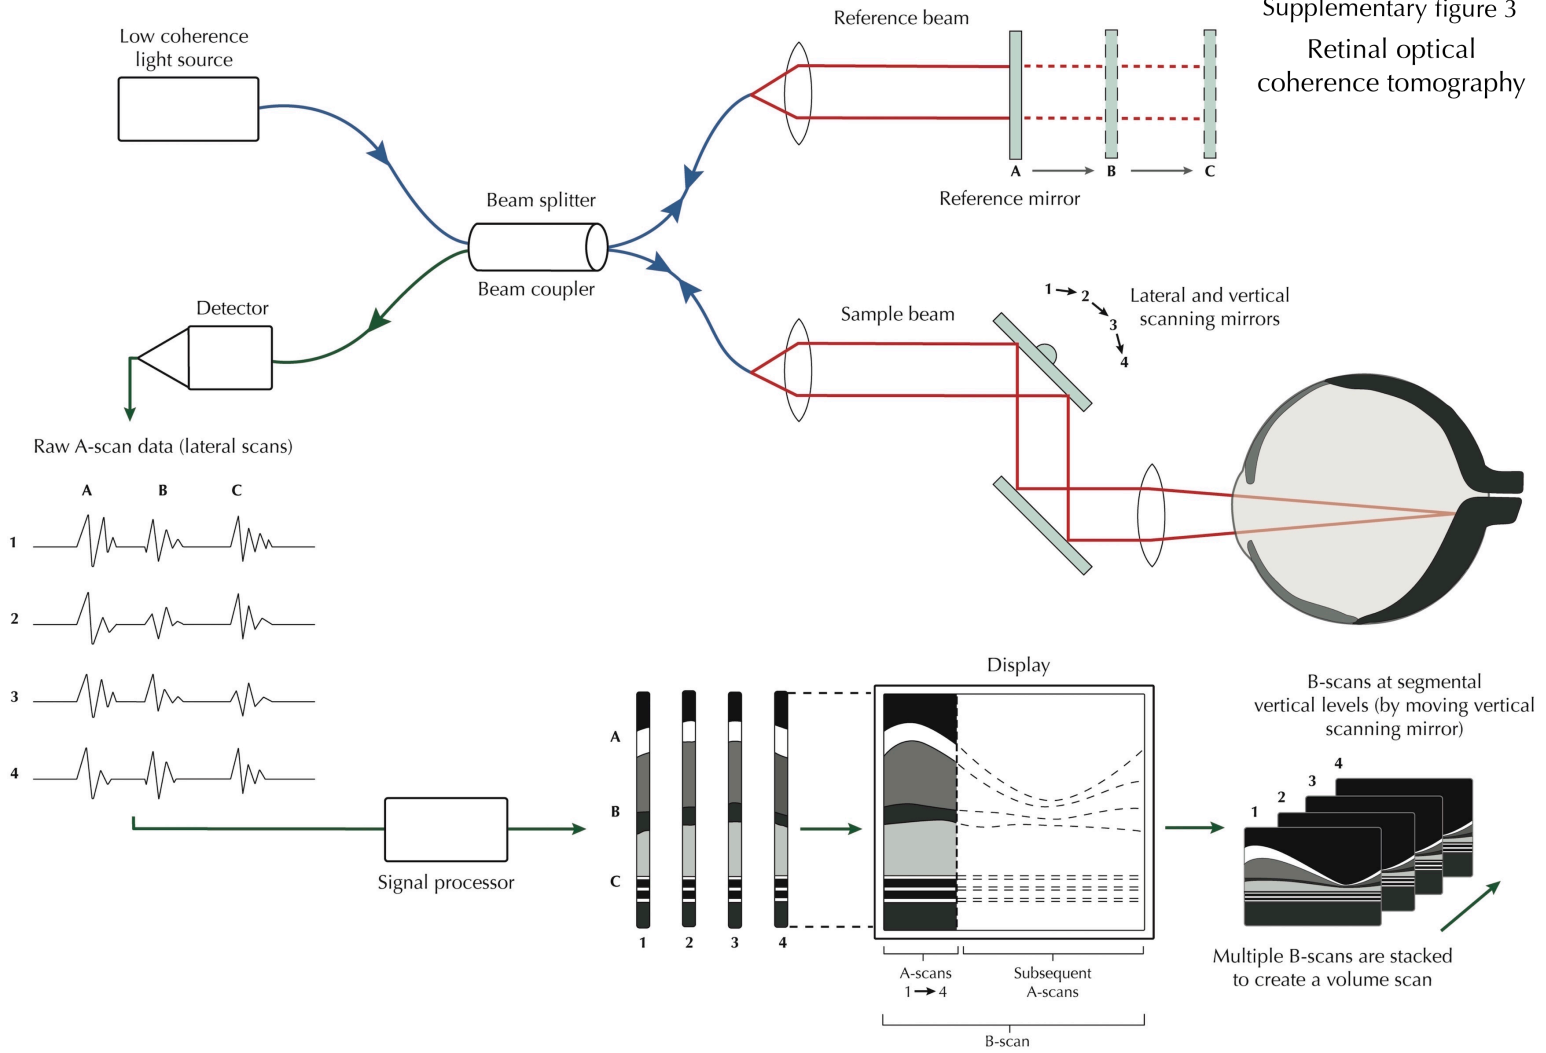

Supplementary figure 4 Retinal layer segmentation by OCT

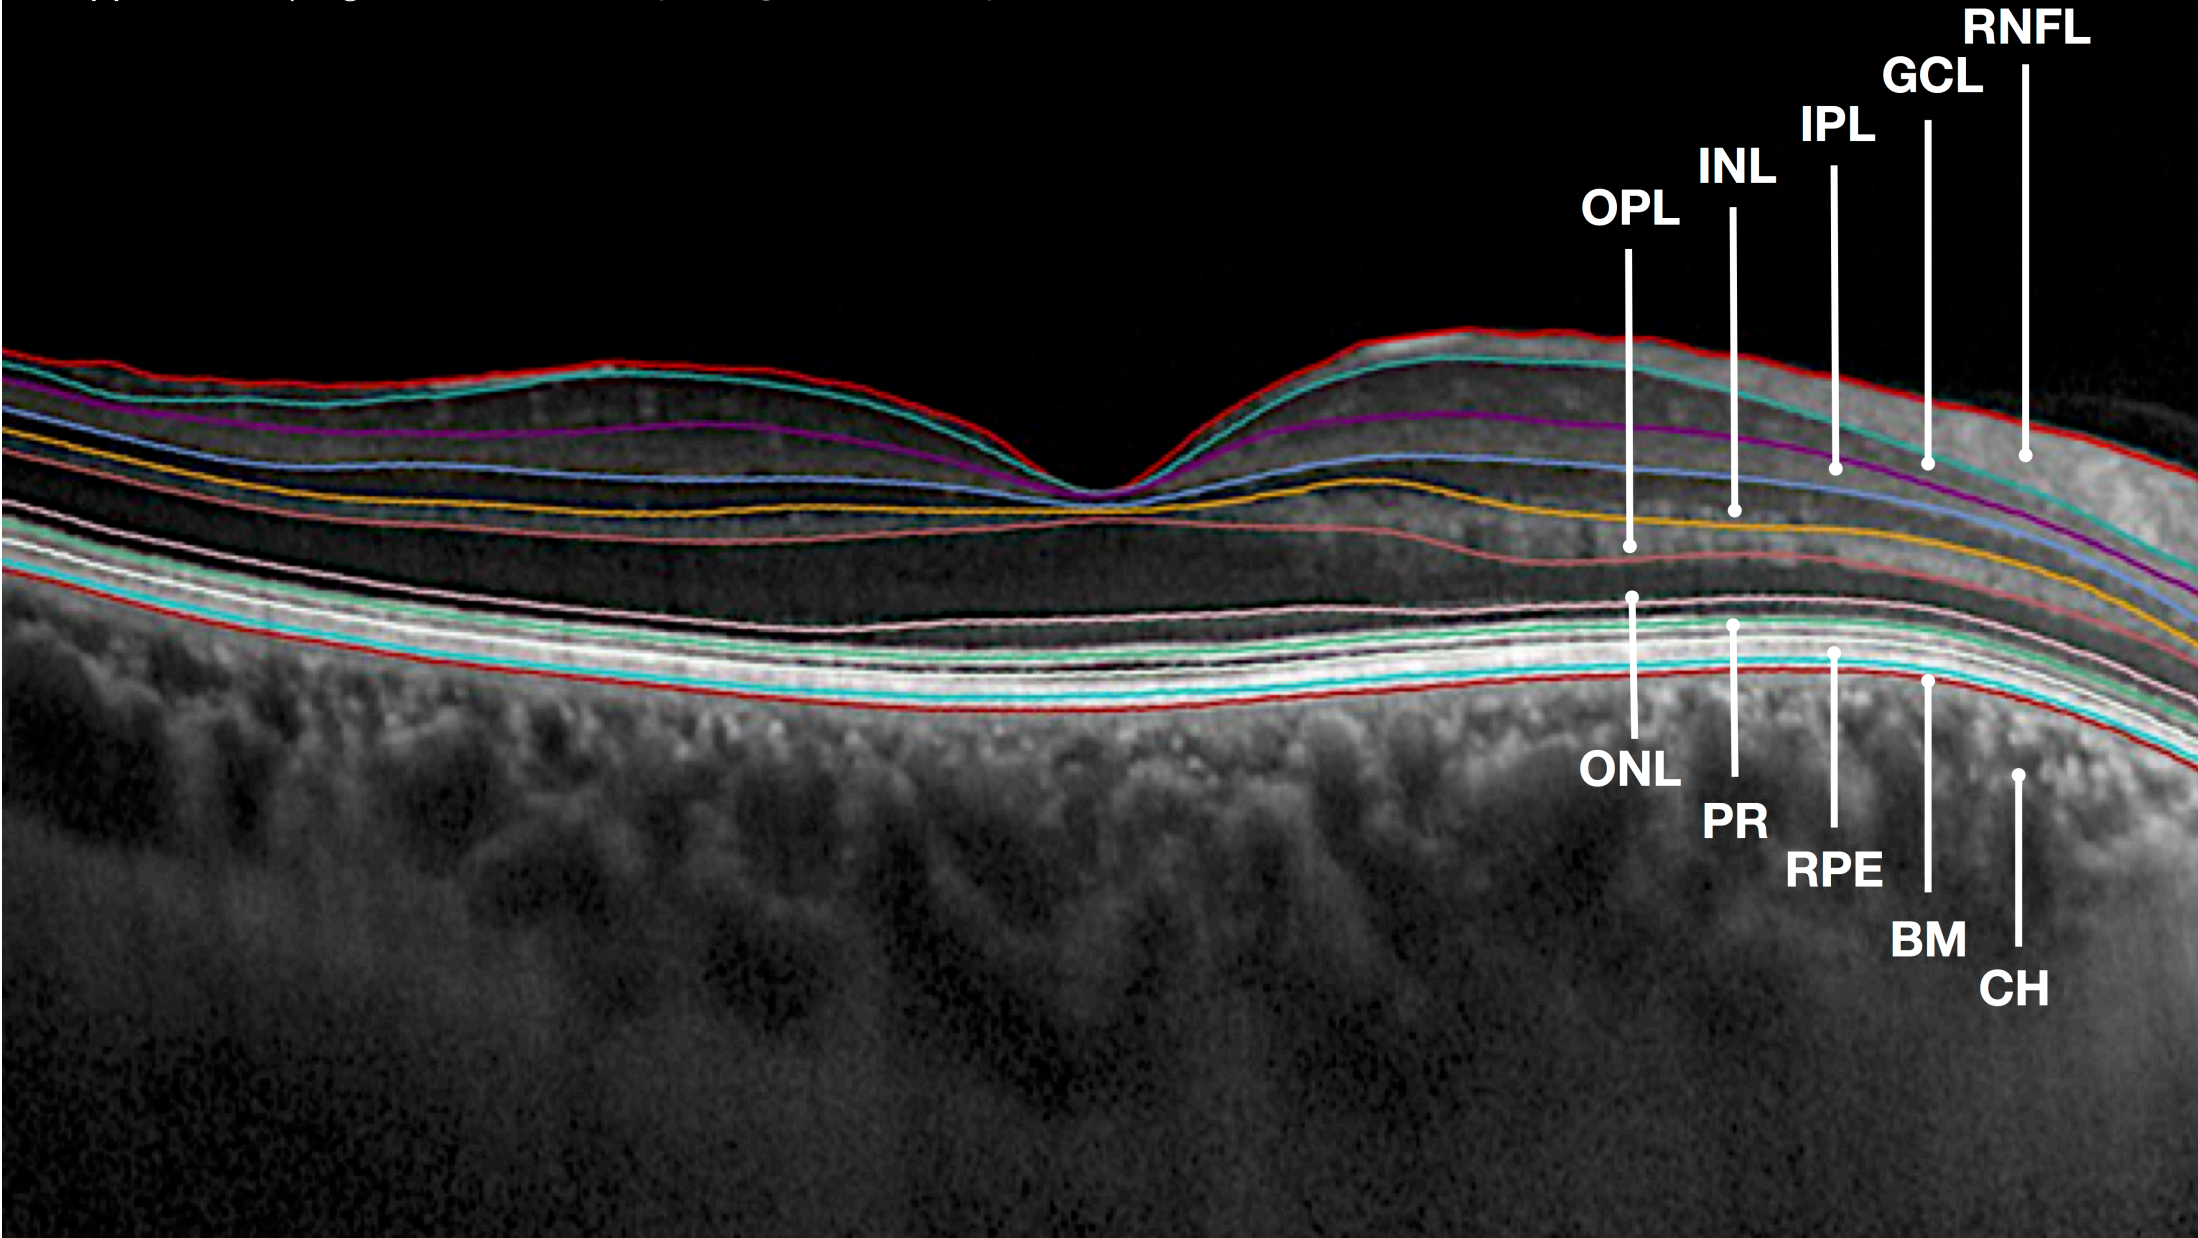



Supplementary figure 5 OCT angiography

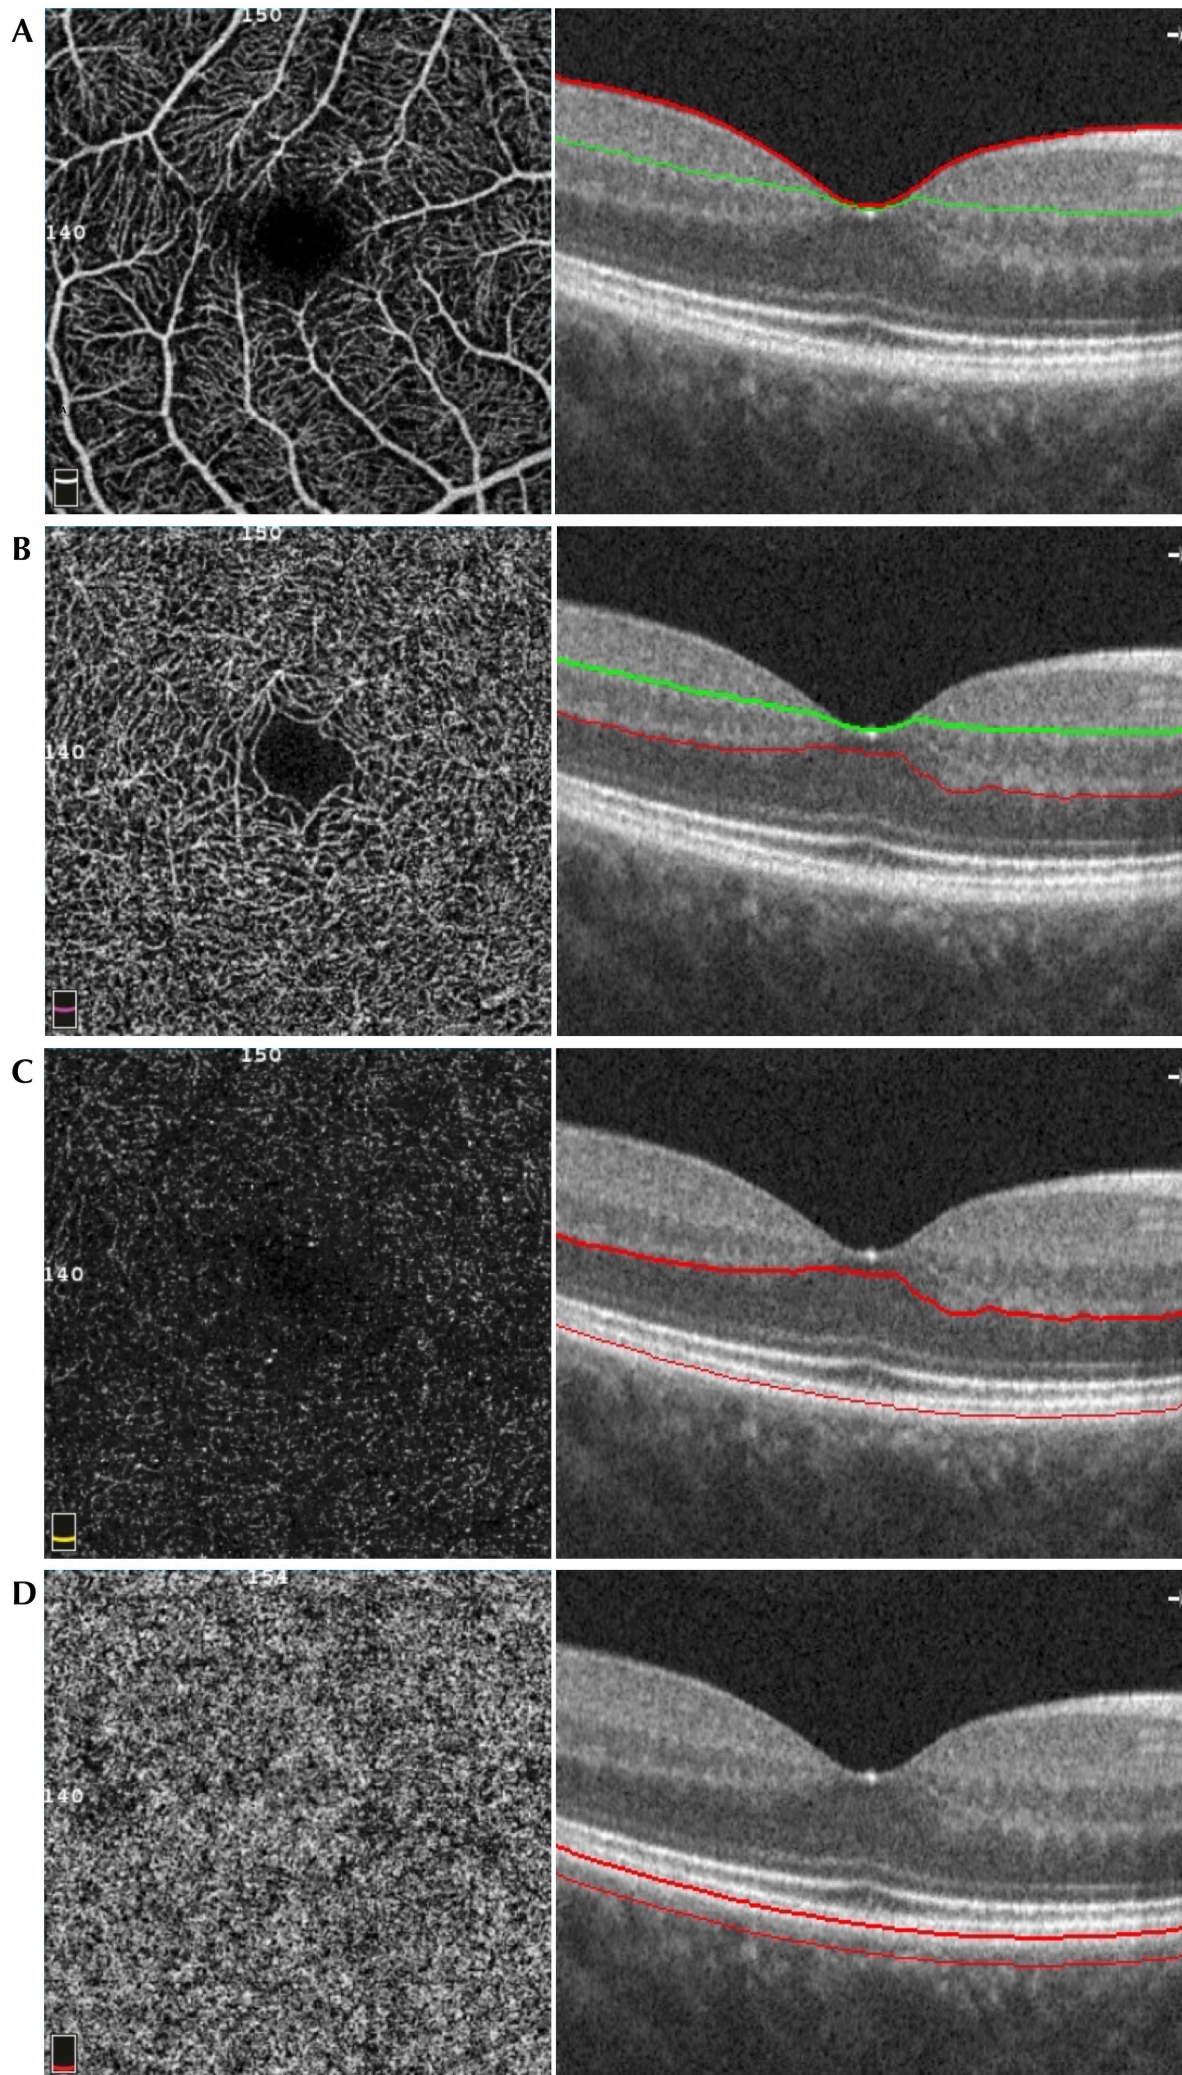

## **10. Supplementary video legends**

### **Supplementary video 1. *OCT in health***

Video of a 3-dimensional rendered macular volume OCT scan of right eye from a healthy volunteer.

### **Supplementary video 2. *OCT in CKD***

Video of a 3-dimensional rendered macular volume OCT scan of right eye from an age- and sex-matched subject with CKD. Note marked thinning of choroidal vascular lying underneath the retina.

### **Supplementary video 3. *OCT angiography of macula in health***

Video of sequential ‘layer by layer’ OCT angiograms centred on macula of right eye from a healthy volunteer. The track bar on the left-hand side relates colour-coded anatomic localisation of retinal regions that correspond to the angiograms shown in main panel.

### **Supplementary video 4. *OCT angiography of optic disc in health***

Video of sequential ‘layer by layer’ OCT angiograms centred on fundus of right eye from a healthy volunteer. The track bar on the left-hand side relates colour-coded anatomic localisation of retinal regions that correspond to the angiograms shown in main panel.

Supplementary information is available on Kidney International's web site

## 11. References

- S1. Wong TY, Klein R, Sharrett AR, *et al.*: Retinal arteriolar diameter and risk for hypertension. *Ann Intern Med*, 140: 248-255, 2004.
- S2. Wong TY, Shankar A, Klein R, *et al.*: Prospective cohort study of retinal vessel diameters and risk of hypertension. *BMJ*, 329: 79, 2004.
- S3. Smith W, Wang JJ, Wong TY, *et al.*: Retinal arteriolar narrowing is associated with 5-year incident severe hypertension: the Blue Mountains Eye Study. *Hypertension*, 44: 442-447, 2004.
- S4. Ikram MK, Witteman JC, Vingerling JR, *et al.*: Retinal vessel diameters and risk of hypertension: the Rotterdam Study. *Hypertension*, 47: 189-194, 2006.
- S5. Kawasaki R, Cheung N, Wang JJ, *et al.*: Retinal vessel diameters and risk of hypertension: the Multiethnic Study of Atherosclerosis. *J Hypertens*, 27: 2386-2393, 2009.
- S6. Tanabe Y, Kawasaki R, Wang JJ, *et al.*: Retinal arteriolar narrowing predicts 5-year risk of hypertension in Japanese people: the Funagata study. *Microcirculation*, 17: 94-102, 2010.
- S7. Wong TY, Klein R, Sharrett AR, *et al.*: Retinal arteriolar narrowing and risk of diabetes mellitus in middle-aged persons. *JAMA*, 287: 2528-2533, 2002.
- S8. Wong TY, Shankar A, Klein R, *et al.*: Retinal arteriolar narrowing, hypertension, and subsequent risk of diabetes mellitus. *Arch Intern Med*, 165: 1060-1065, 2005.
- S9. Ikram MK, Janssen JA, Roos AM, *et al.*: Retinal vessel diameters and risk of impaired fasting glucose or diabetes: the Rotterdam study. *Diabetes*, 55: 506-510, 2006.
- S10. Nguyen TT, Wang JJ, Islam FM, *et al.*: Retinal arteriolar narrowing predicts incidence of diabetes: the Australian Diabetes, Obesity and Lifestyle (AusDiab) Study. *Diabetes*, 57: 536-539, 2008.

- S11. Kifley A, Wang JJ, Cugati S, *et al.*: Retinal vascular caliber and the long-term risk of diabetes and impaired fasting glucose: the Blue Mountains Eye Study. *Microcirculation*, 15: 373-377, 2008.
- S12. Wong TY, Klein R, Sharrett AR, *et al.*: Retinal arteriolar narrowing and risk of coronary heart disease in men and women. The Atherosclerosis Risk in Communities Study. *JAMA*, 287: 1153-1159, 2002.
- S13. Wang JJ, Liew G, Wong TY, *et al.*: Retinal vascular calibre and the risk of coronary heart disease-related death. *Heart*, 92: 1583-1587, 2006.
- S14. Liew G, Mitchell P, Rochtchina E, *et al.*: Fractal analysis of retinal microvasculature and coronary heart disease mortality. *Eur Heart J*, 32: 422-429, 2011.
- S15. Wong TY, Klein R, Couper DJ, *et al.*: Retinal microvascular abnormalities and incident stroke: the Atherosclerosis Risk in Communities Study. *Lancet*, 358: 1134-1140, 2001.
- S16. Mitchell P, Wang JJ, Wong TY, *et al.*: Retinal microvascular signs and risk of stroke and stroke mortality. *Neurology*, 65: 1005-1009, 2005.
- S17. Ikram MK, de Jong FJ, Bos MJ, *et al.*: Retinal vessel diameters and risk of stroke: the Rotterdam Study. *Neurology*, 66: 1339-1343, 2006.
- S18. Yatsuya H, Folsom AR, Wong TY, *et al.*: Retinal microvascular abnormalities and risk of lacunar stroke: Atherosclerosis Risk in Communities Study. *Stroke*, 41: 1349-1355, 2010.
- S19. Wieberdink RG, Ikram MK, Koudstaal PJ, *et al.*: Retinal vascular calibers and the risk of intracerebral hemorrhage and cerebral infarction: the Rotterdam Study. *Stroke*, 41: 2757-2761, 2010.
- S20. Cheung CY, Tay WT, Ikram MK, *et al.*: Retinal microvascular changes and risk of stroke: the Singapore Malay Eye Study. *Stroke*, 44: 2402-2408, 2013.

- S21. Wong TY, Klein R, Nieto FJ, *et al.*: Retinal microvascular abnormalities and 10-year cardiovascular mortality: a population-based case-control study. *Ophthalmology*, 110: 933-940, 2003.
- S22. Wong TY, Islam FM, Klein R, *et al.*: Retinal vascular caliber, cardiovascular risk factors, and inflammation: the Multi-Ethnic Study of Atherosclerosis (MESA). *Invest Ophthalmol Vis Sci*, 47: 2341-2350, 2006.
- S23. Wang JJ, Liew G, Klein R, *et al.*: Retinal vessel diameter and cardiovascular mortality: pooled data analysis from two older populations. *Eur Heart J*, 28: 1984-1992, 2007.
- S24. Seidemann SB, Claggett B, Bravo PE, *et al.*: Retinal vessel calibers in predicting long-term cardiovascular outcomes: the Atherosclerosis Risk In Communities study. *Circulation*, 134: 1328-1338, 2016.
- S25. Yip W, Sabanayagam C, Ong PG, *et al.*: Joint effect of early microvascular damage in the eye & kidney on risk of cardiovascular events. *Sci Rep*, 6: 27442, 2016.
- S26. Savige J, Sheth S, Leys A, *et al.*: Ocular features in Alport's syndrome: pathogenesis and clinical significance. *Clin J Am Soc Nephrol*, 10: 703-709, 2015.
- S27. Colville D, Savige J, Branley P, Wilson D: Ocular abnormalities in thin basement membrane disease. *Br J Ophthalmol*, 81: 373-377, 1997.
